# Supplementary material for: Tracking human population structure through time from whole genome sequences
Source: PubMed Central journal article supplement (PMC7082067; doi:10.1371/journal.pgen.1008552), 2020-03-09

— N1 — N2      Clean-split      — MSMC      - - MSMC-IM

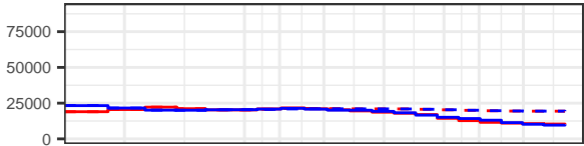

Split-with-migration

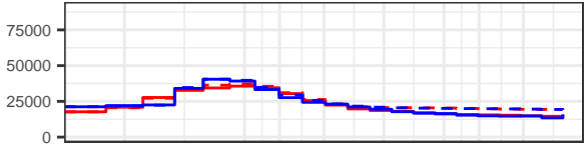

Split-with-5%archaic-admixture

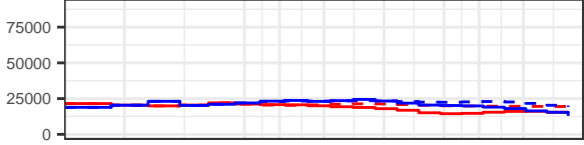

Split-with-5%archaic-admixture&bottleneck

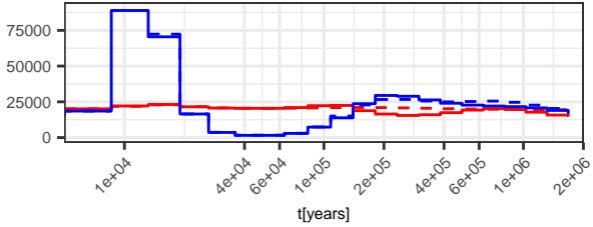

Supplement: pgen.1008552.s003.pdf [file pgen.1008552.s003.pdf]
