# Supplementary material for: Tracking human population structure through time from whole genome sequences
Source: PubMed Central journal article supplement (PMC7082067; doi:10.1371/journal.pgen.1008552), 2020-03-09

A

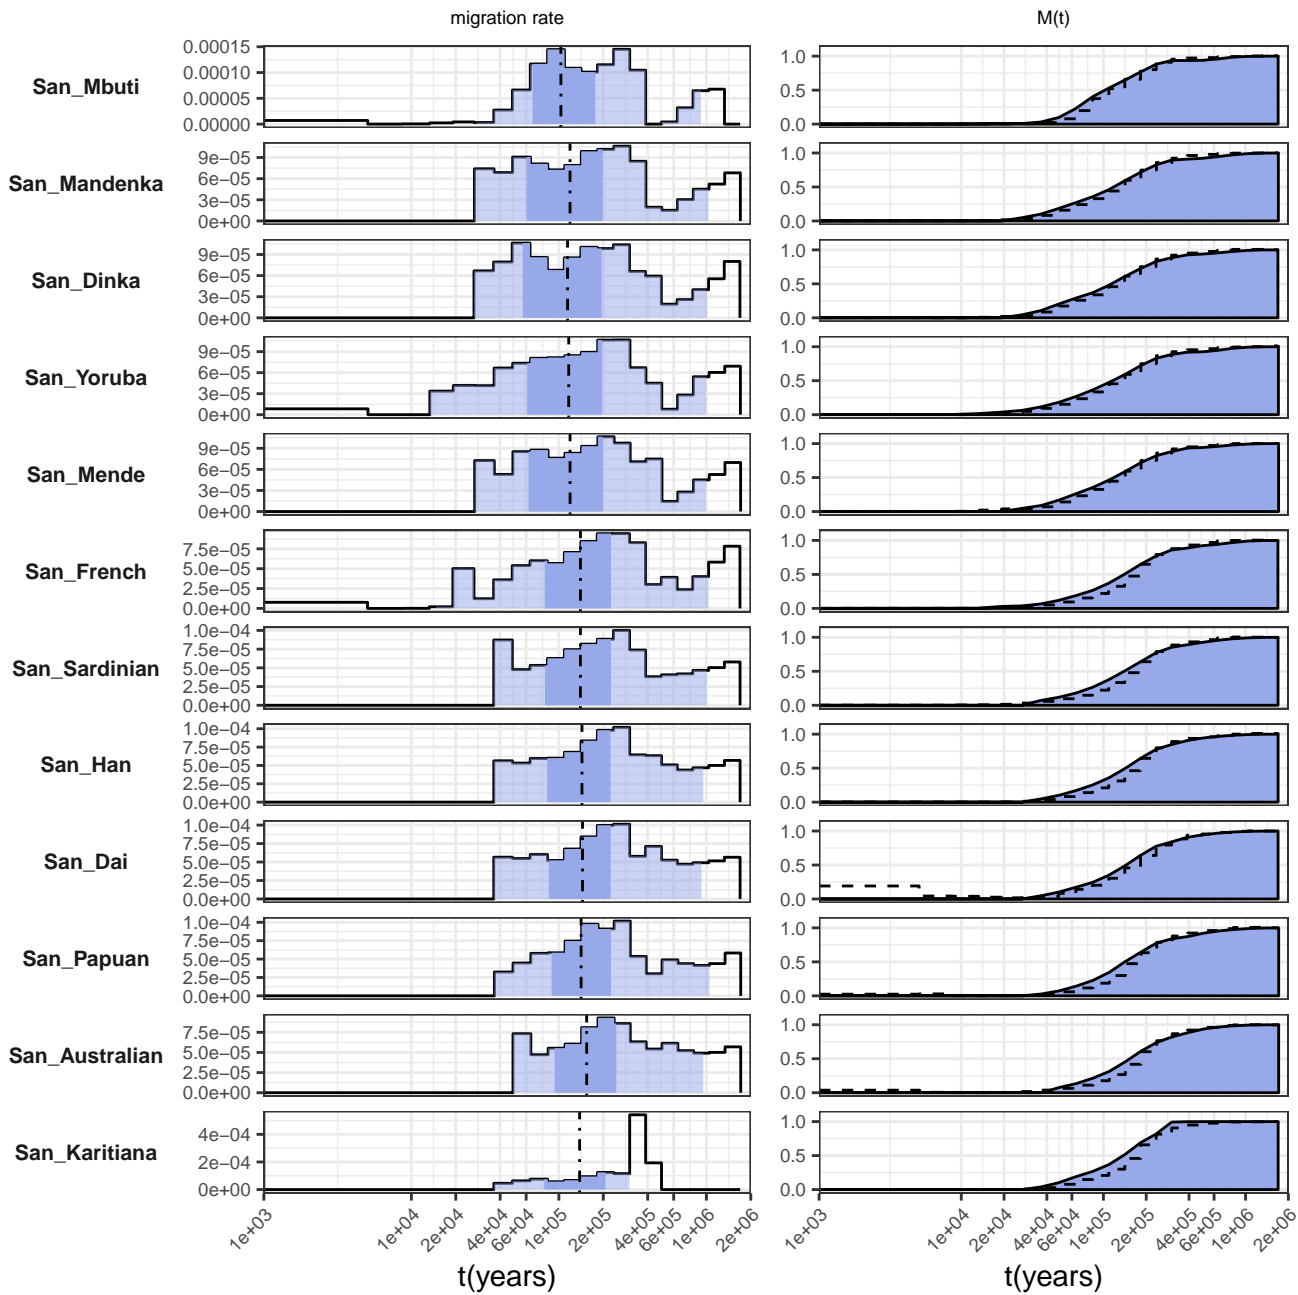

B

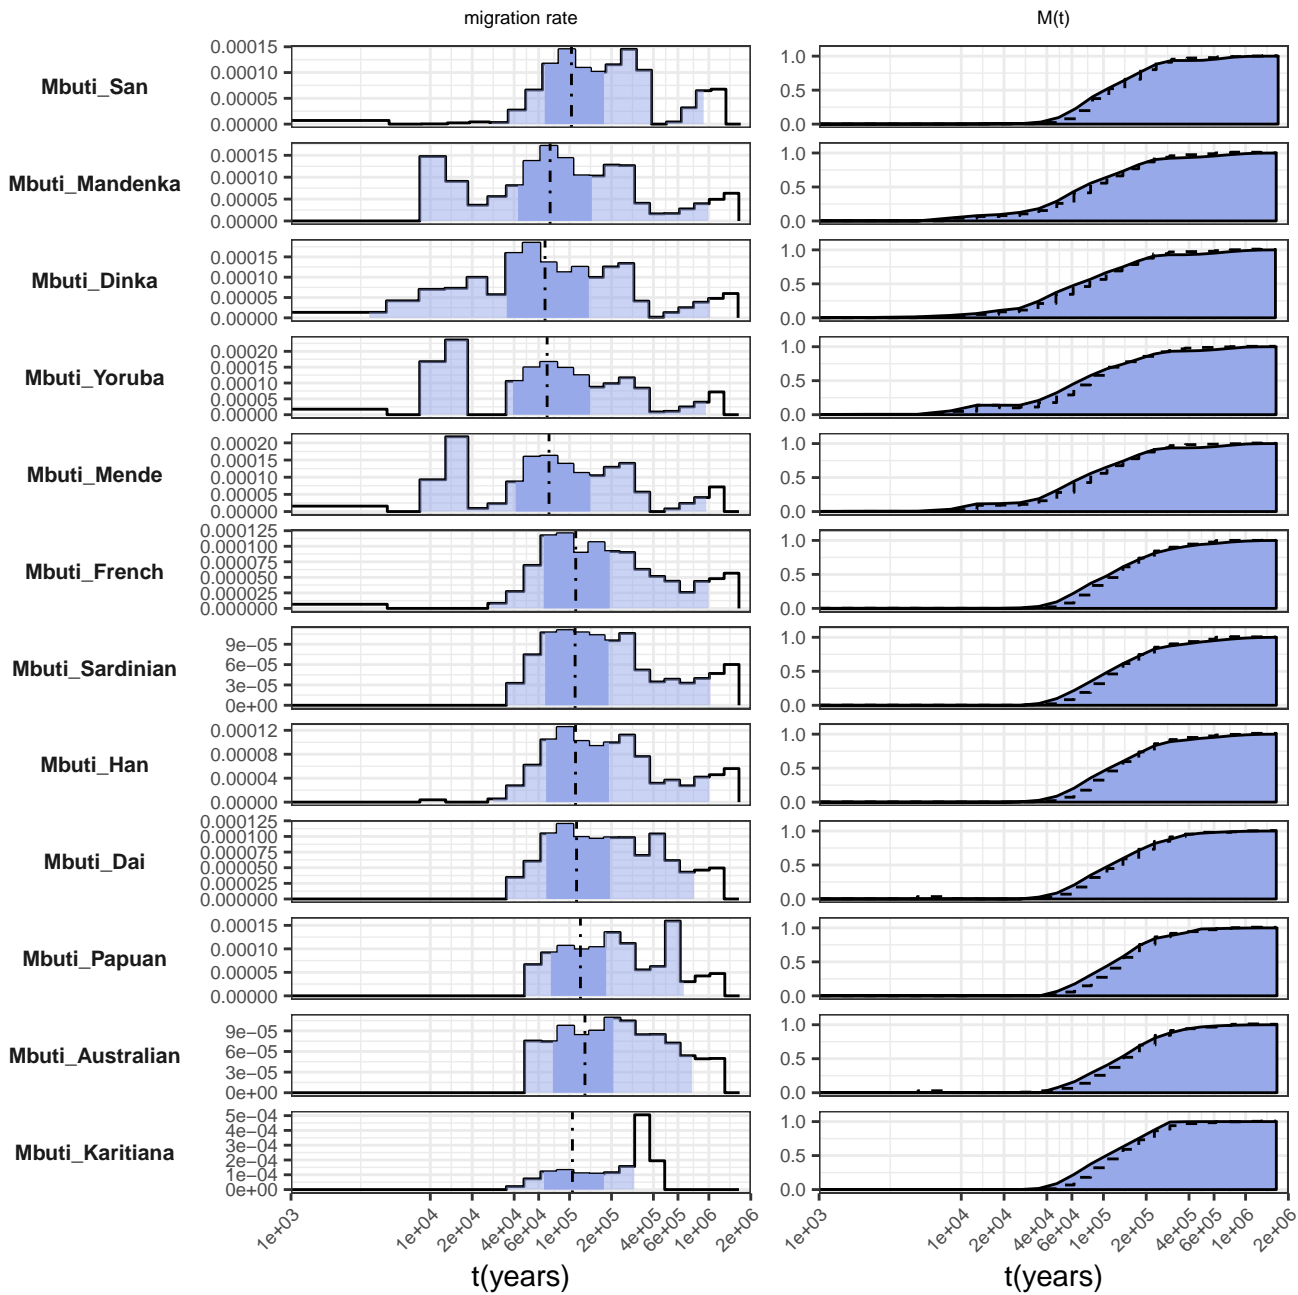

C

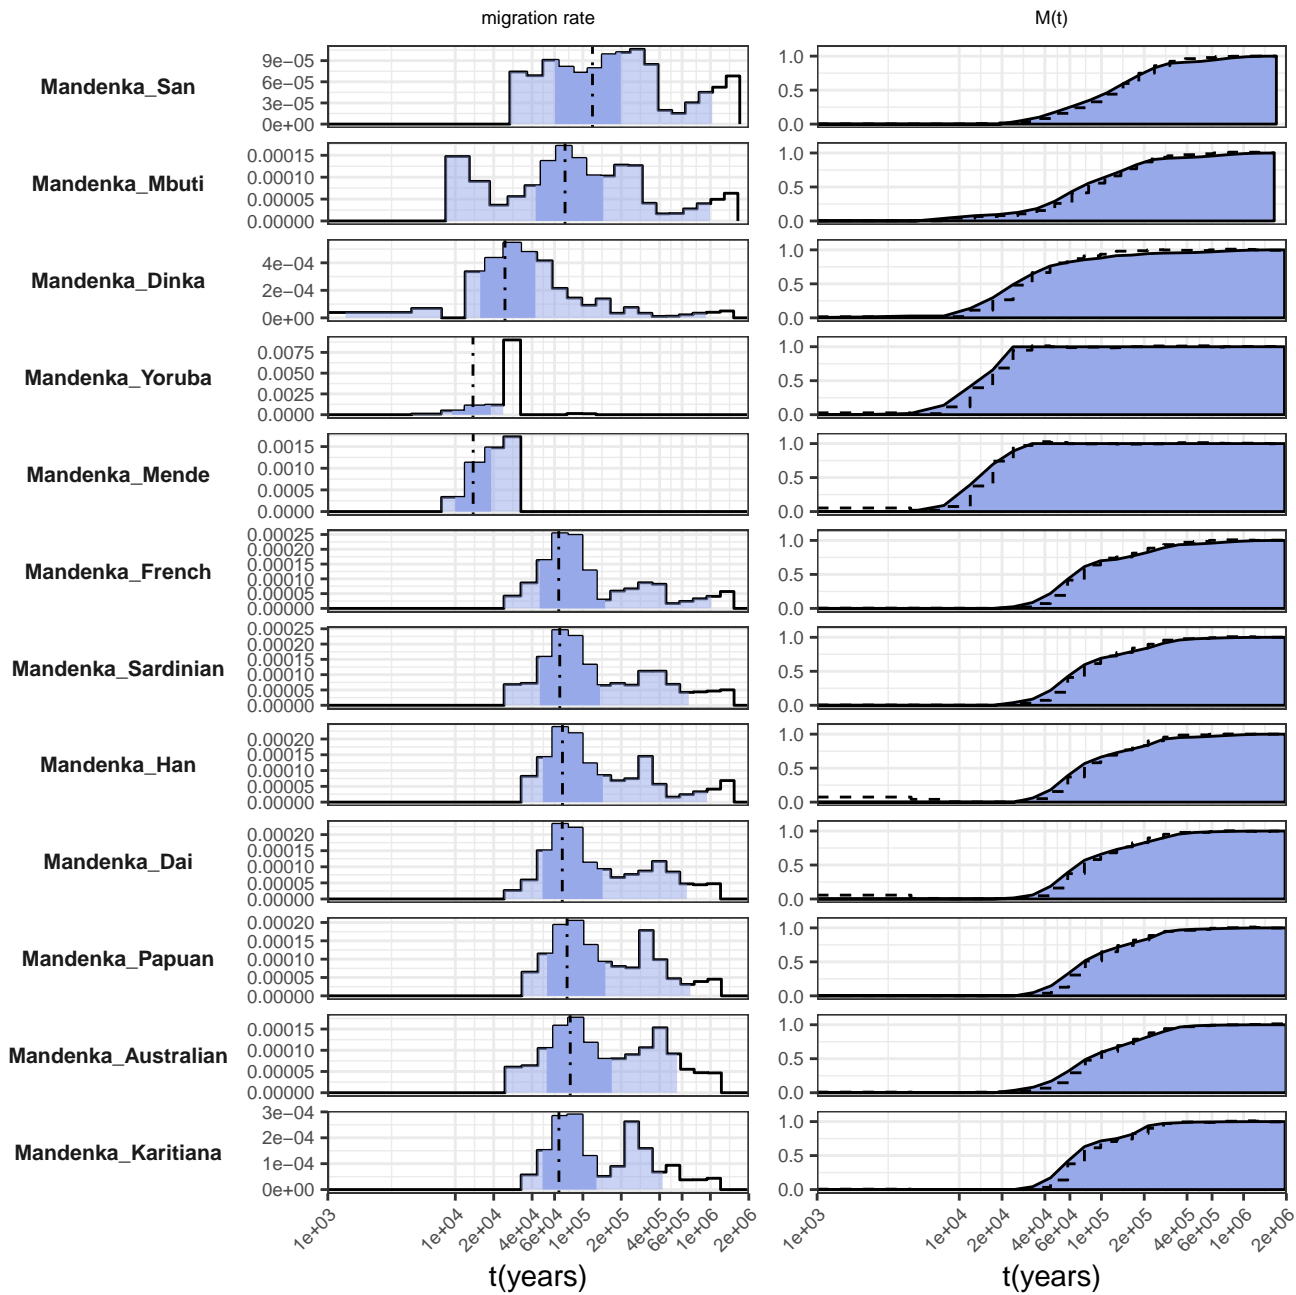

**D**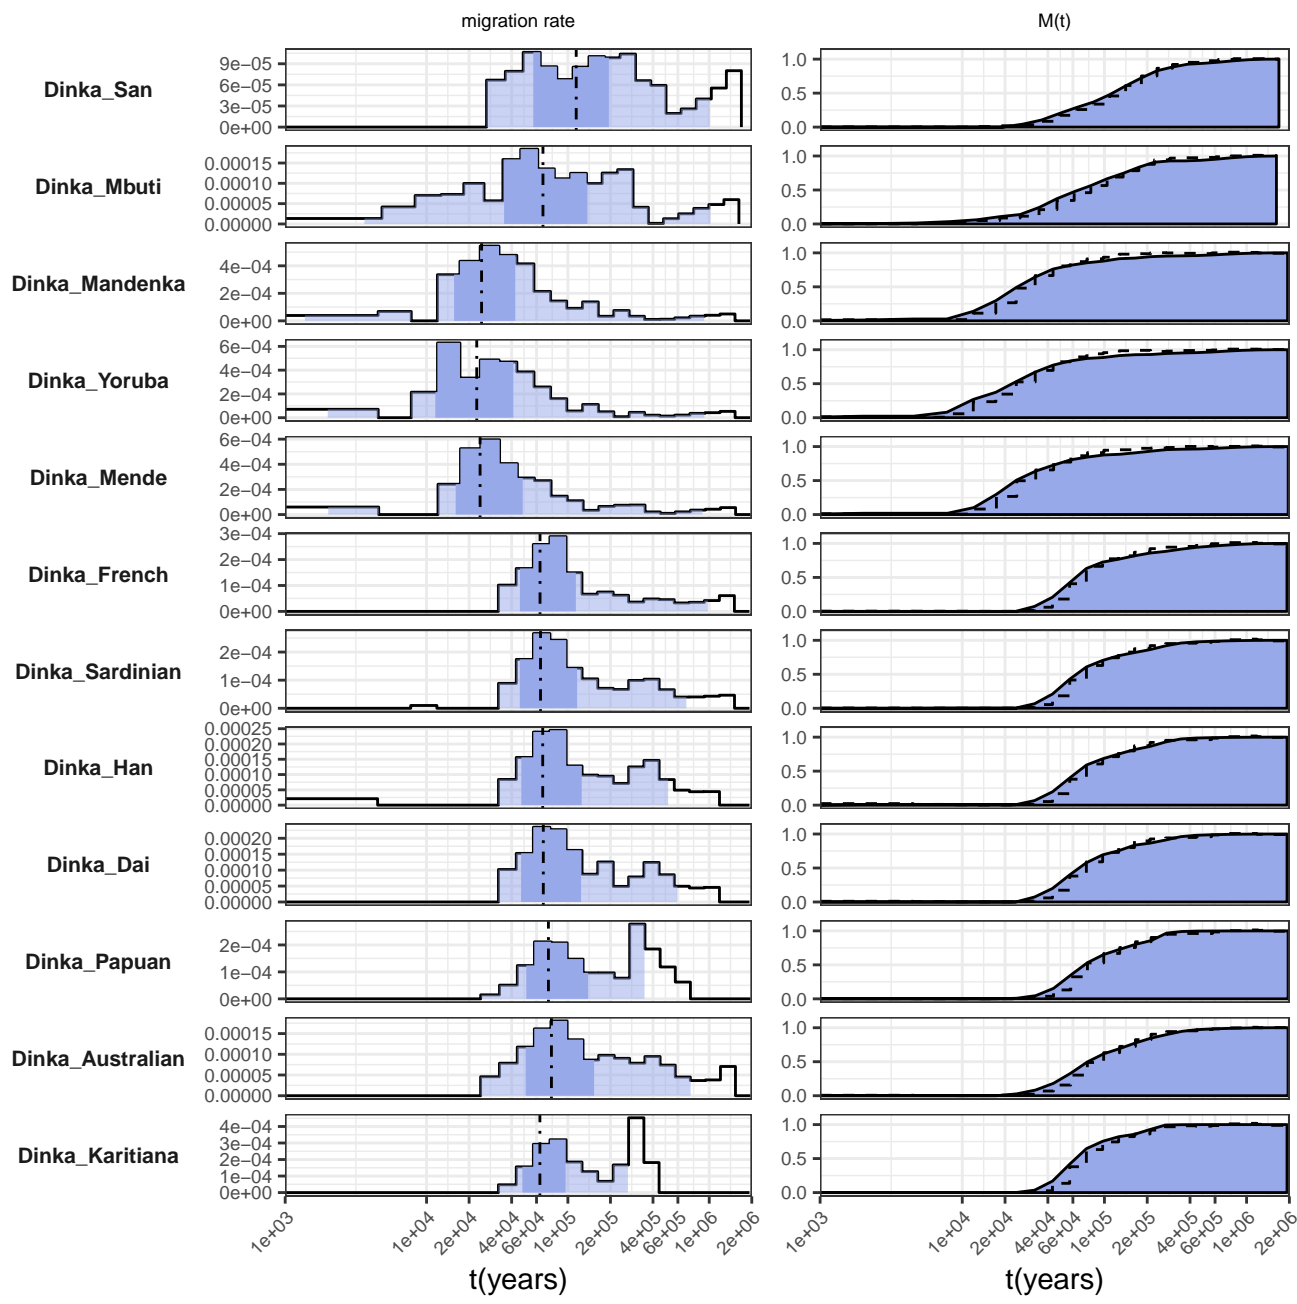

E

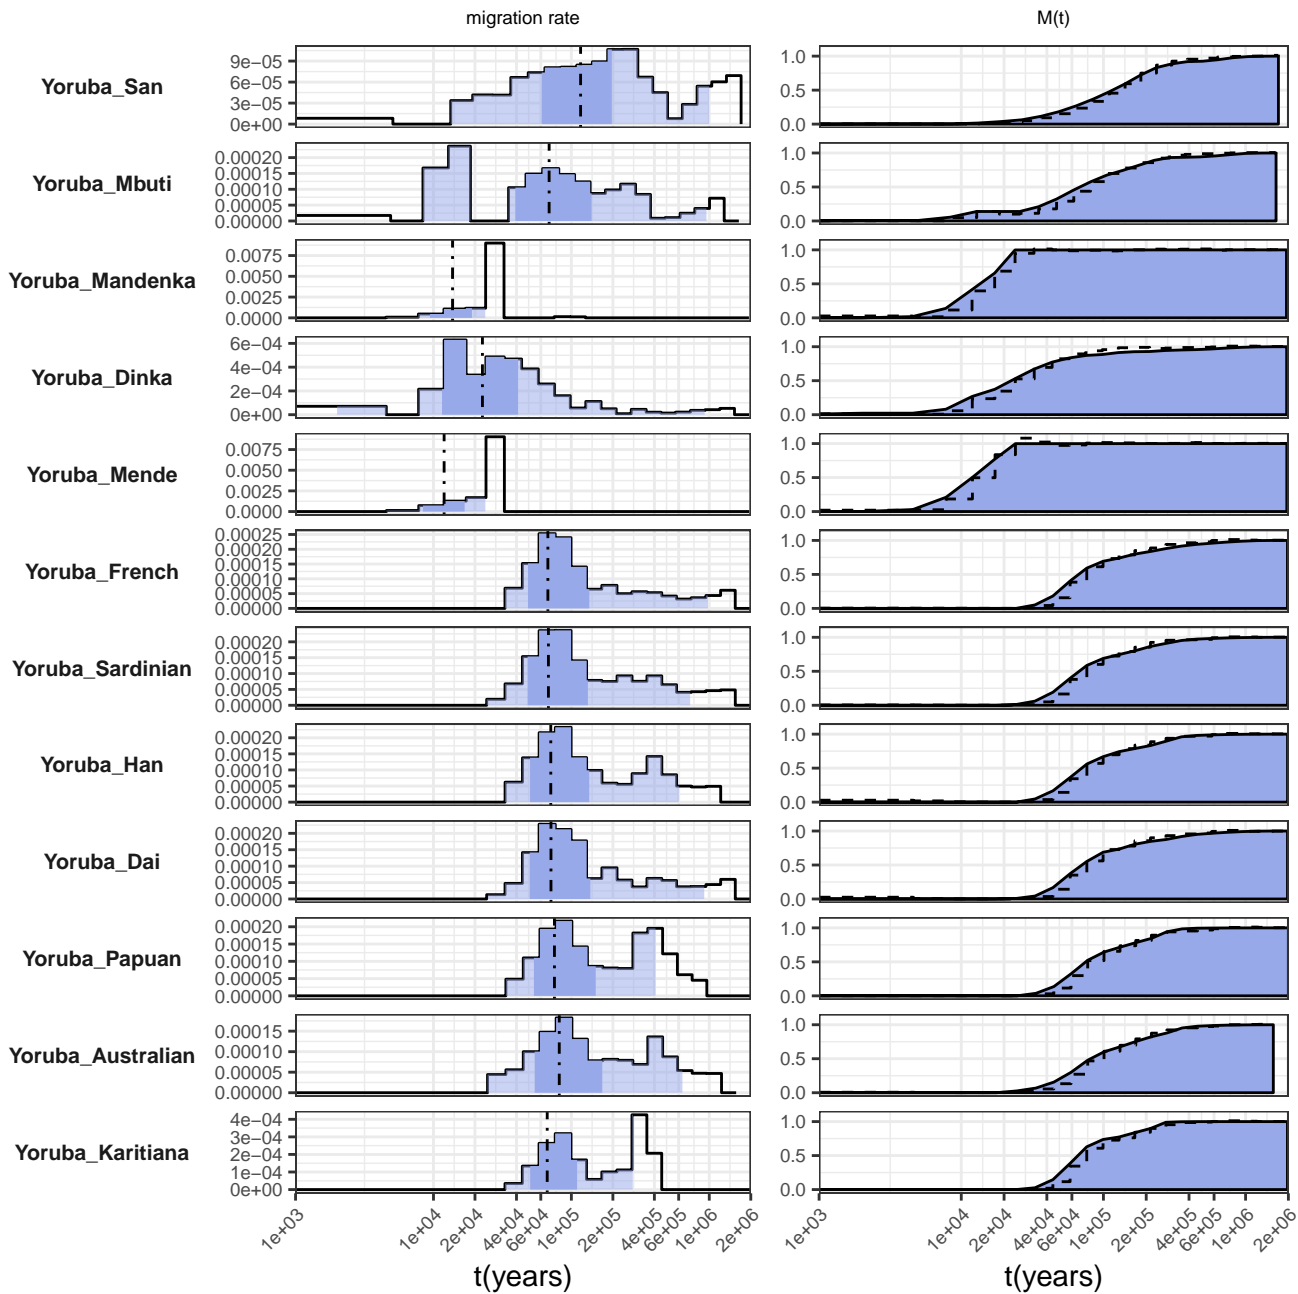

F

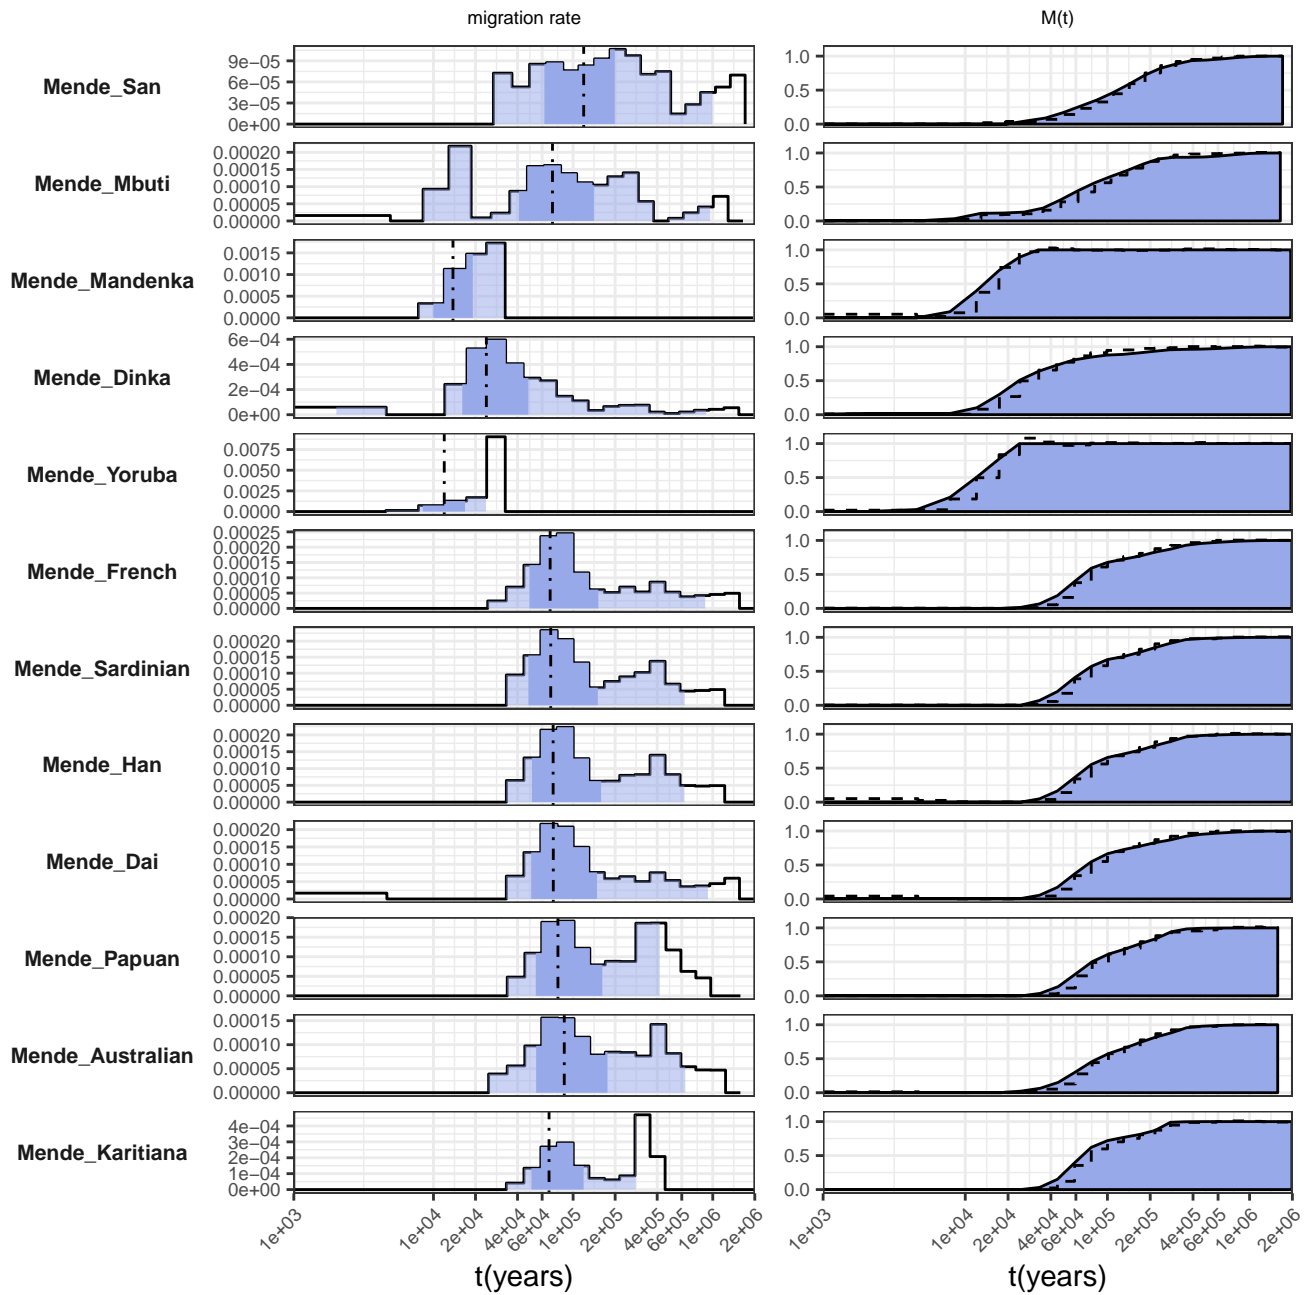

G

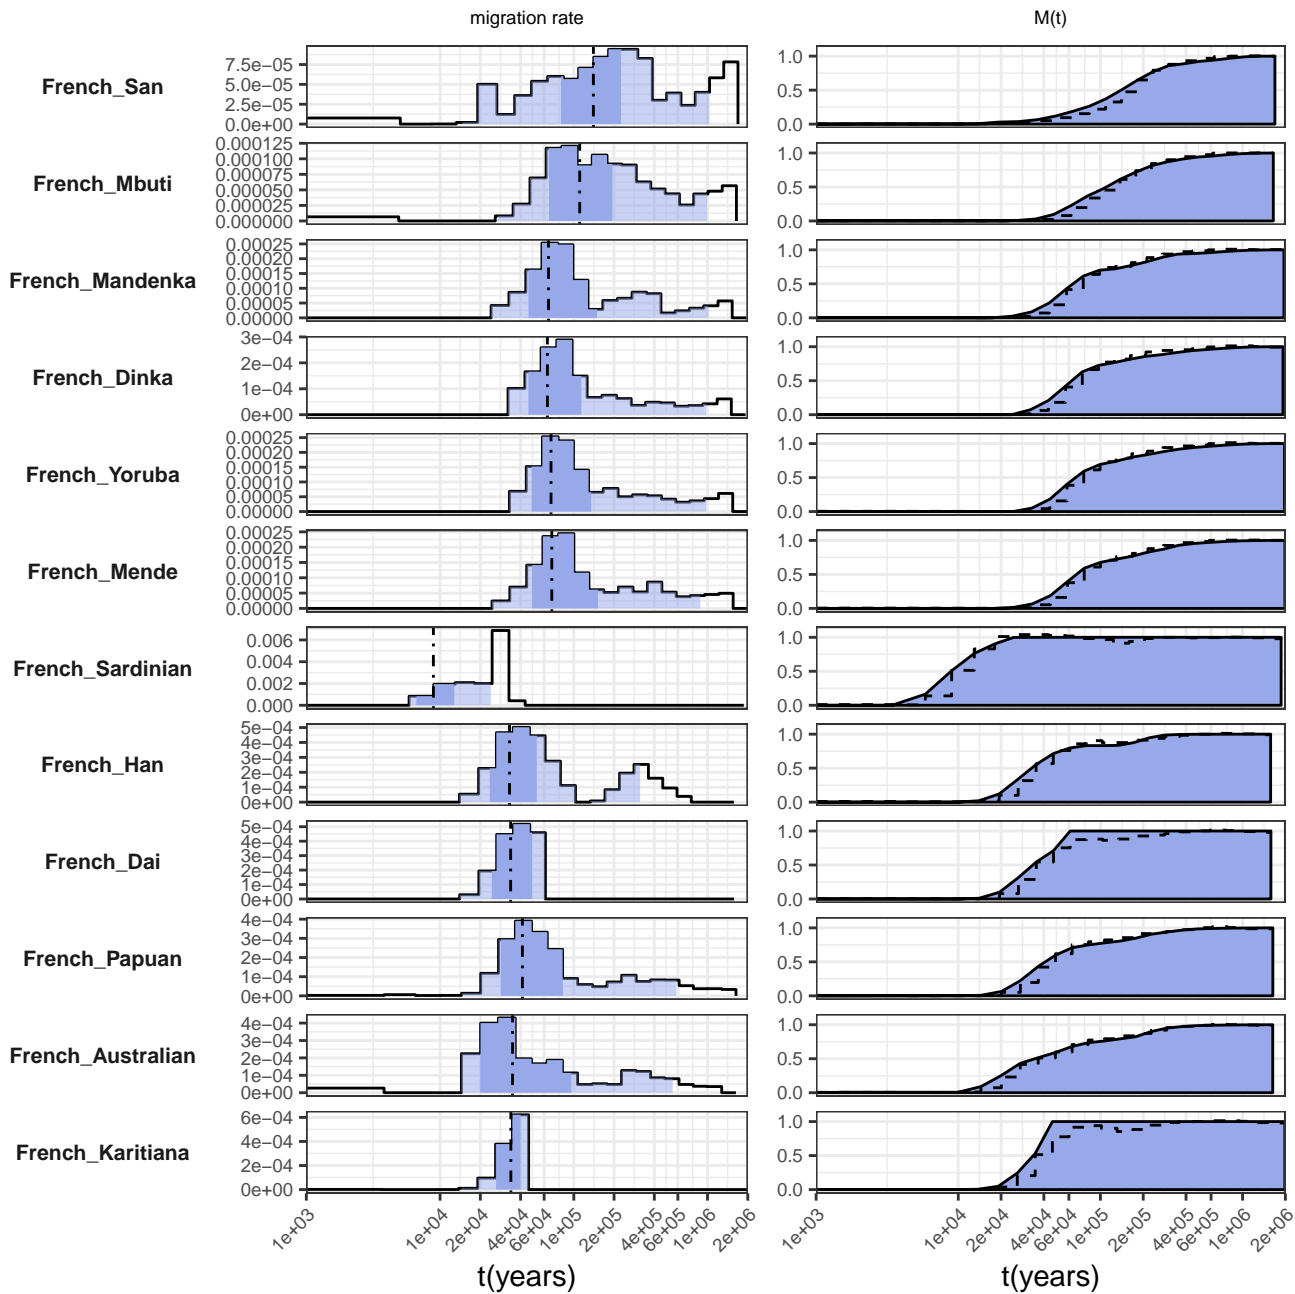

H

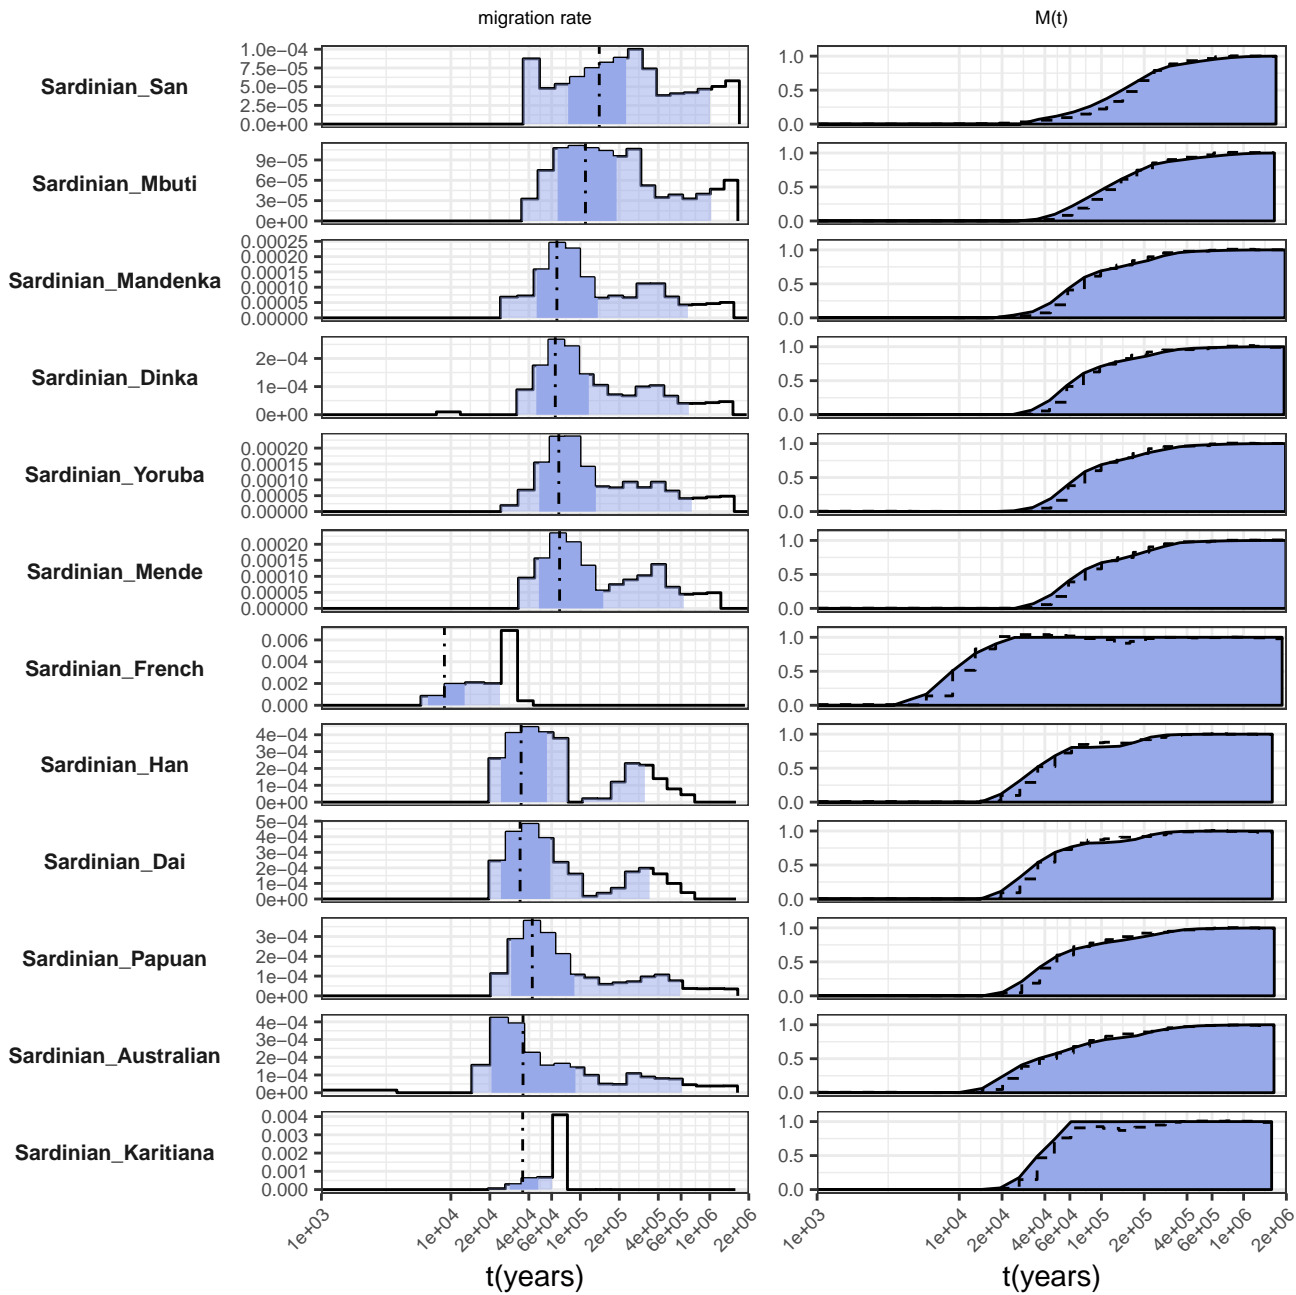



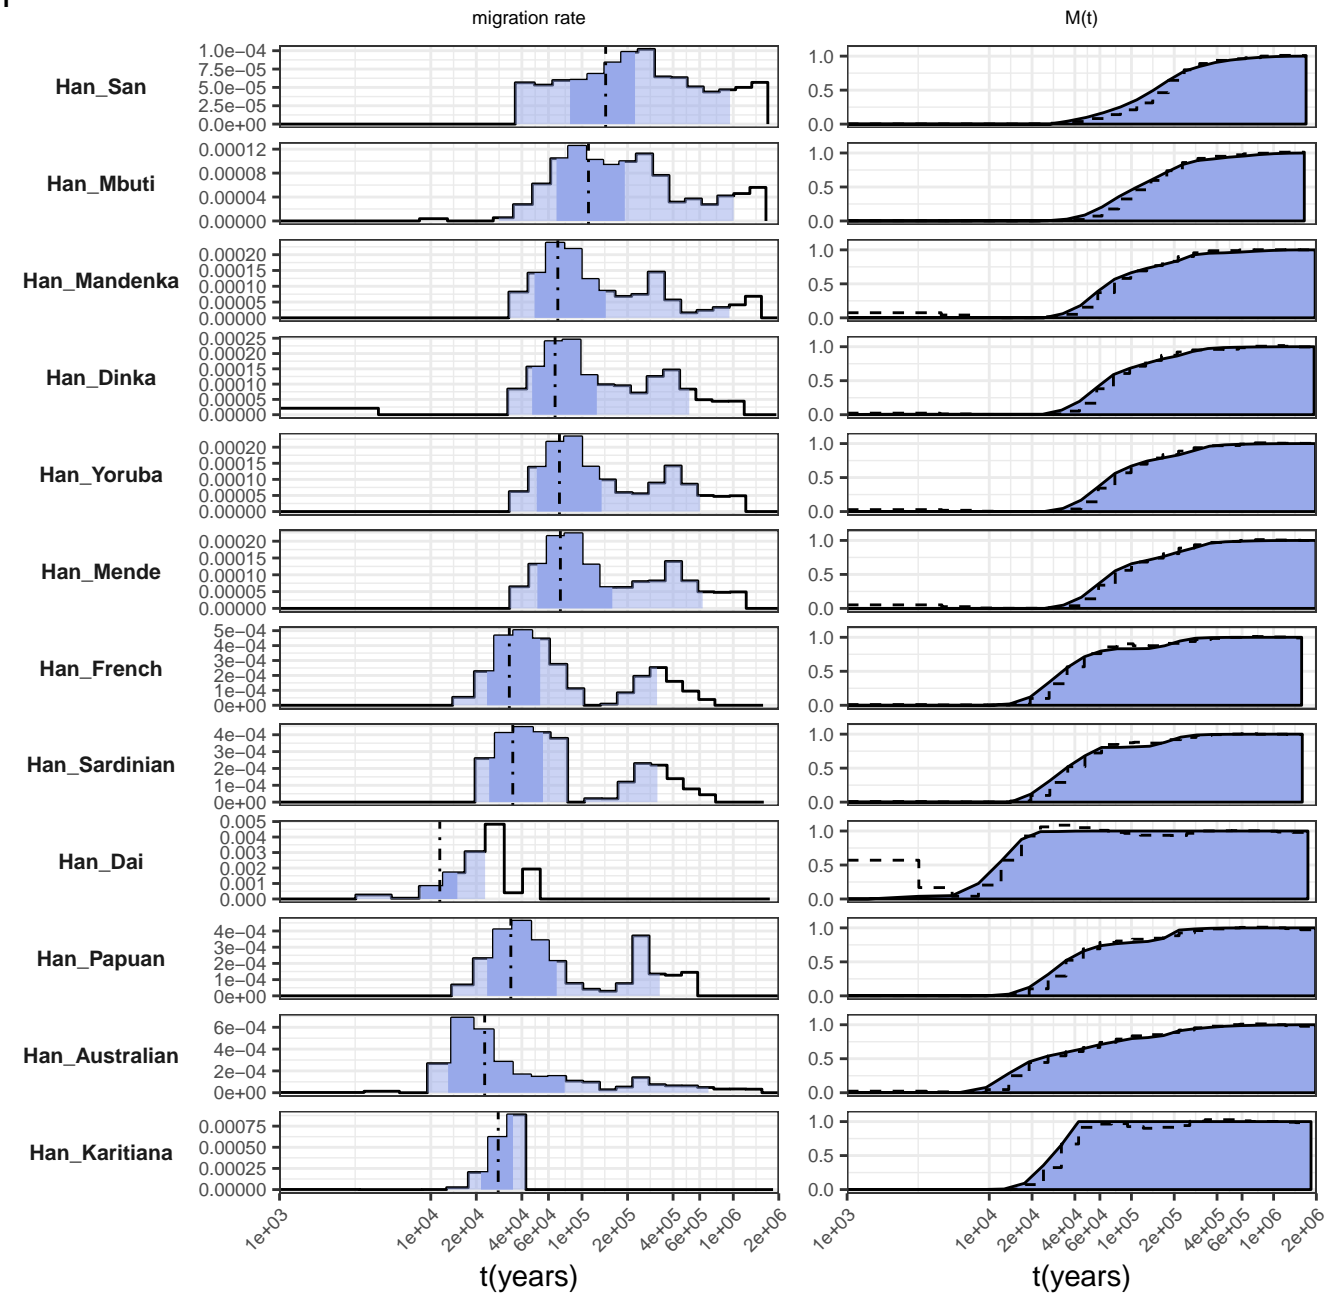

J

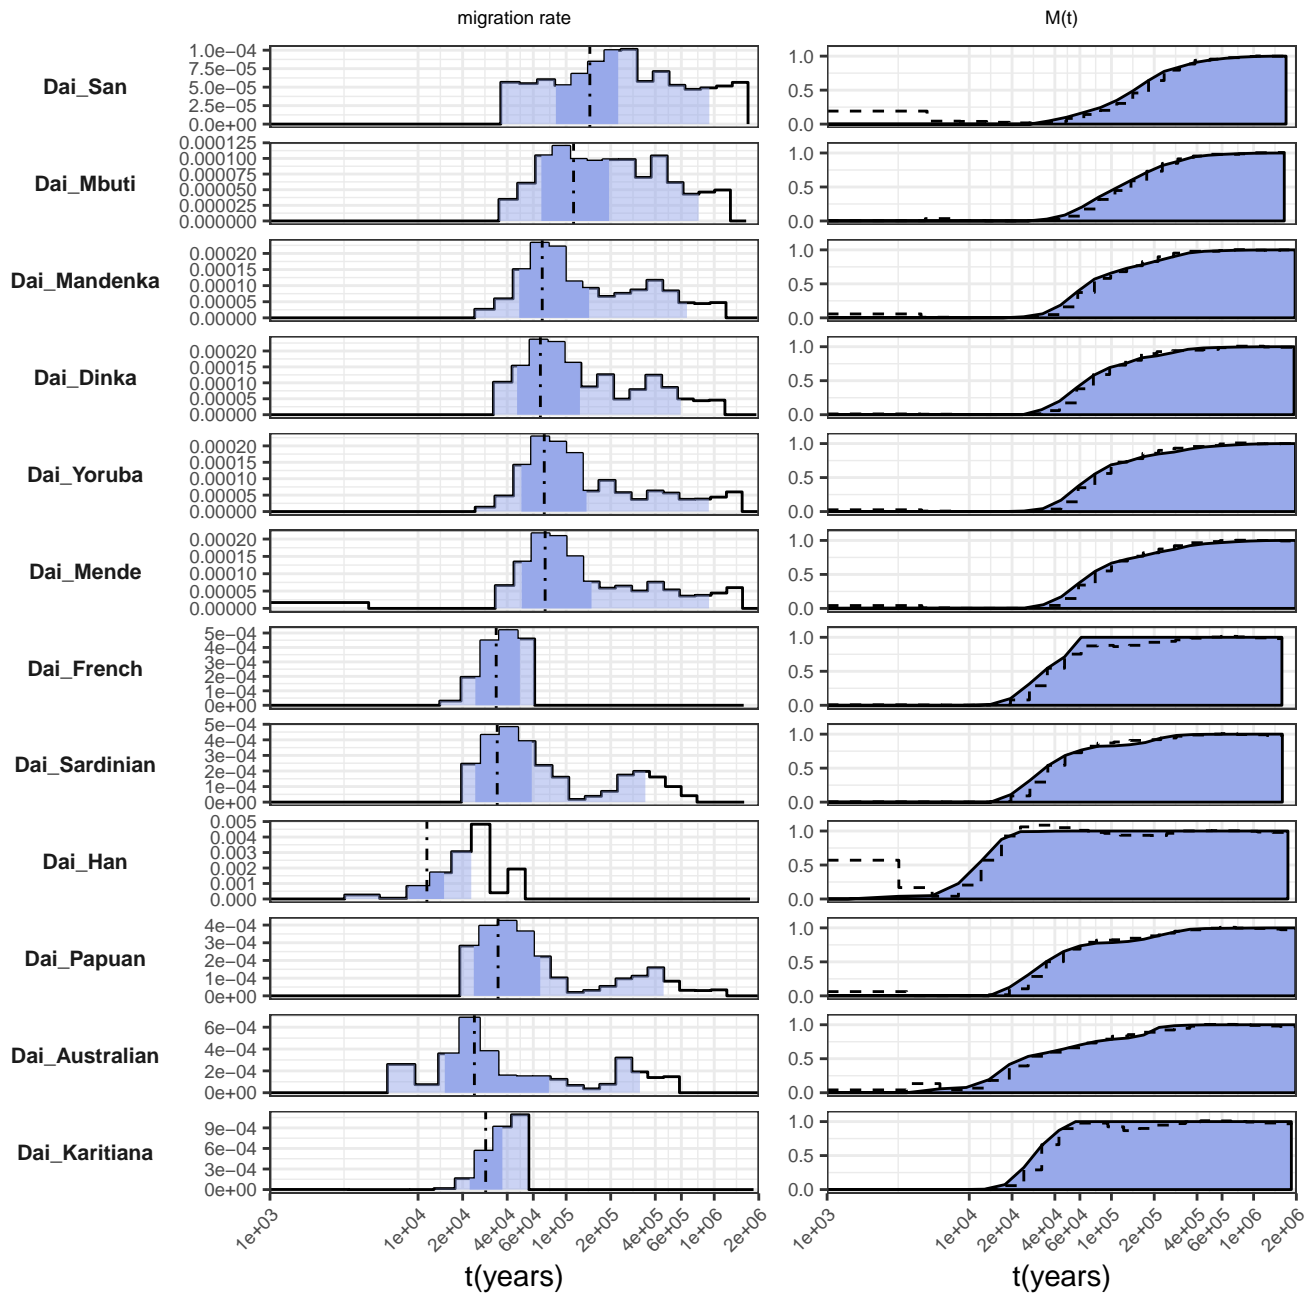

K

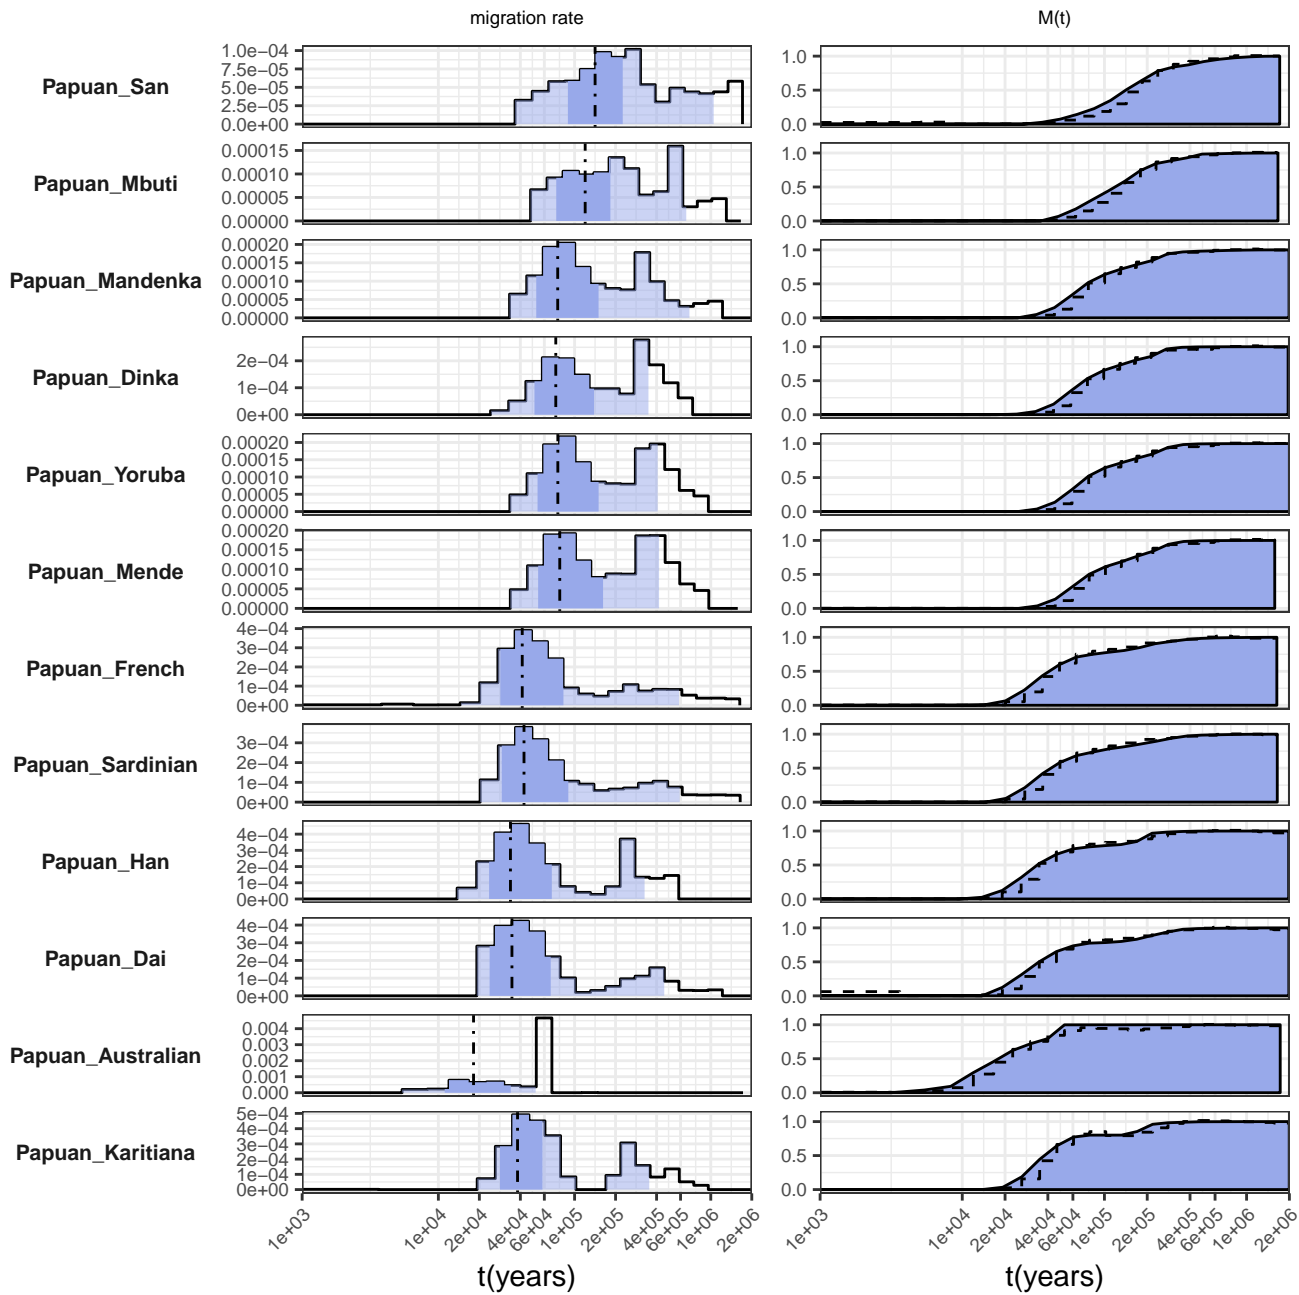

L

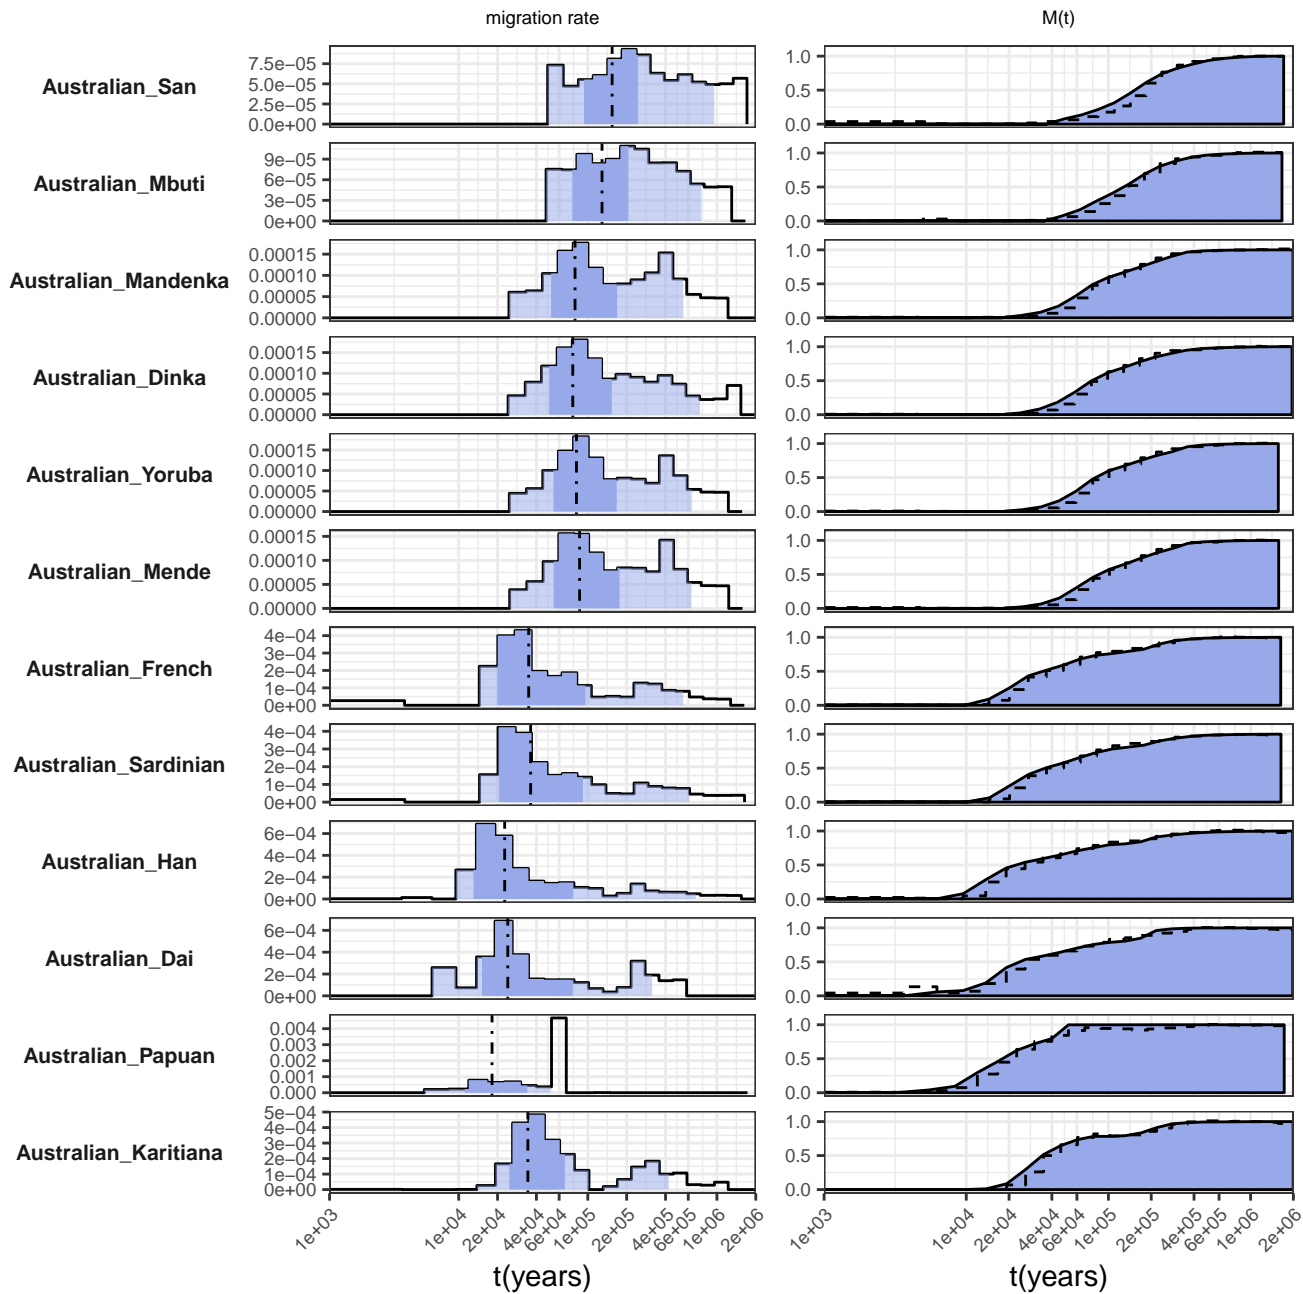

M

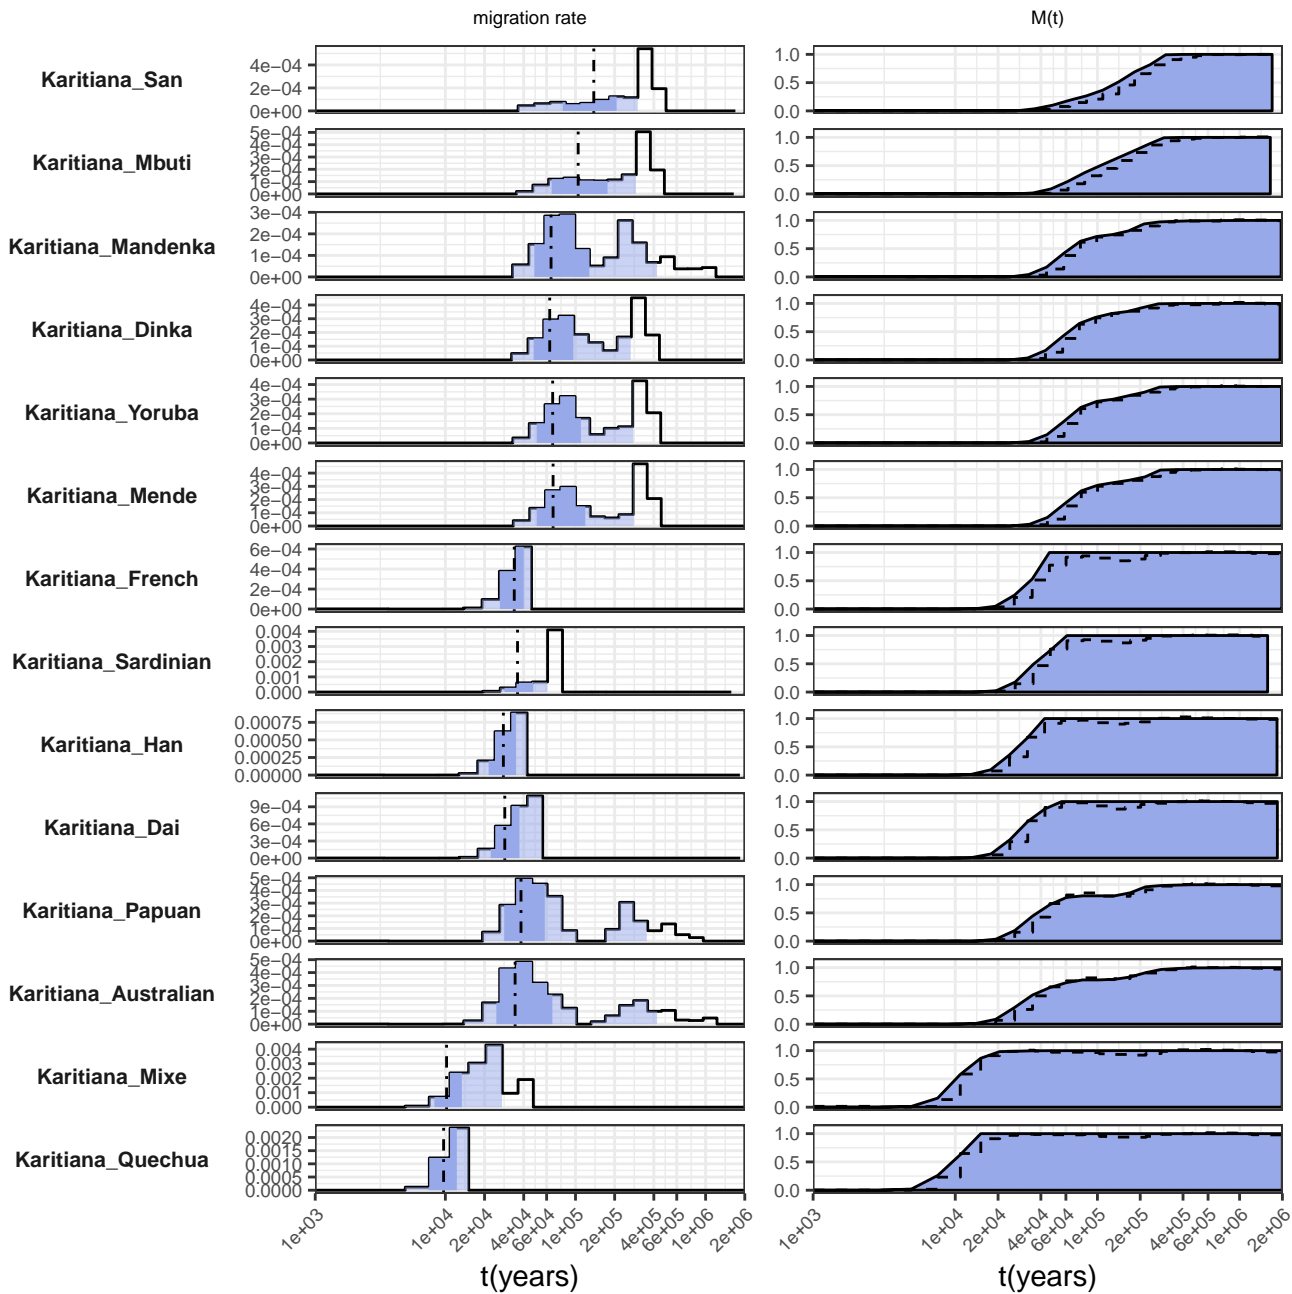

Supplement: pgen.1008552.s004.pdf [file pgen.1008552.s004.pdf]
