# Supplementary material for: Tracking human population structure through time from whole genome sequences
Source: PubMed Central journal article supplement (PMC7082067; doi:10.1371/journal.pgen.1008552), 2020-03-09

**A**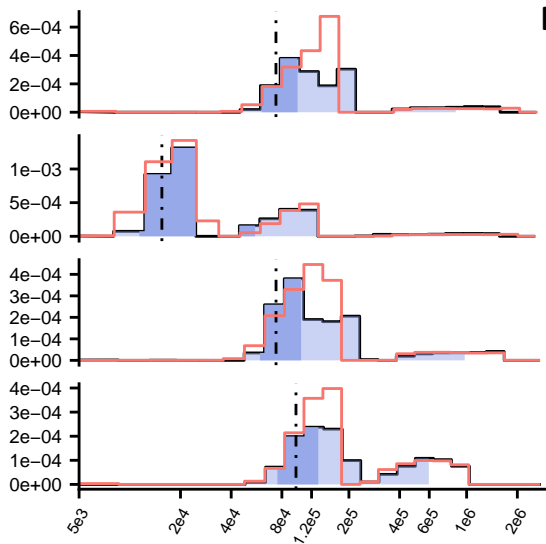**B**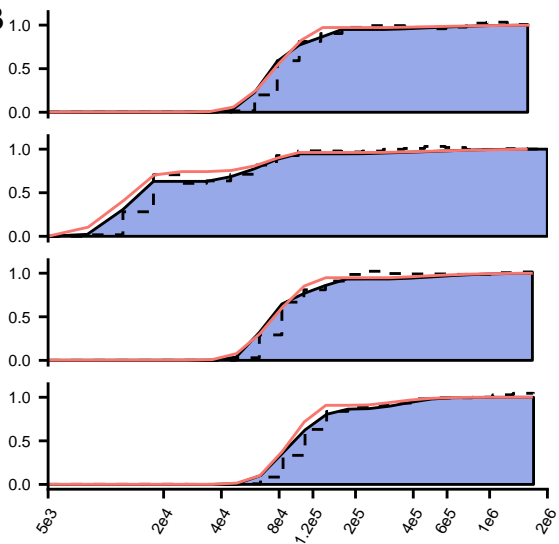

Supplement: pgen.1008552.s011.pdf [file pgen.1008552.s011.pdf]
